# Supplementary material for: Ionic and electronic conductivities of atomic layer deposition thin film coated lithium ion battery cathode particles
Source: Royal Society of Chemistry journal article supplement (doi:10.1039/c6ra20829k), 2016-01-01
Supplement: c6ra20829k1.pdf [file c6ra20829k1.pdf]

## Supporting Information

### Ionic and Electronic Conductivities of Atomic Layer Deposition Thin Film Coated Lithium Ion Battery Cathode Particles

Rajankumar L. Patel,<sup>a</sup> Jonghyun Park<sup>b</sup> and Xinhua Liang<sup>\*a</sup>

<sup>a</sup> Department of Chemical and Biochemical Engineering, Missouri University of Science and Technology, Rolla, MO 65409, United States

<sup>b</sup> Department of Mechanical and Aerospace Engineering, Missouri University of Science and Technology, Rolla, MO 65409, United States

\* Corresponding author, Email: liangxin@mst.edu

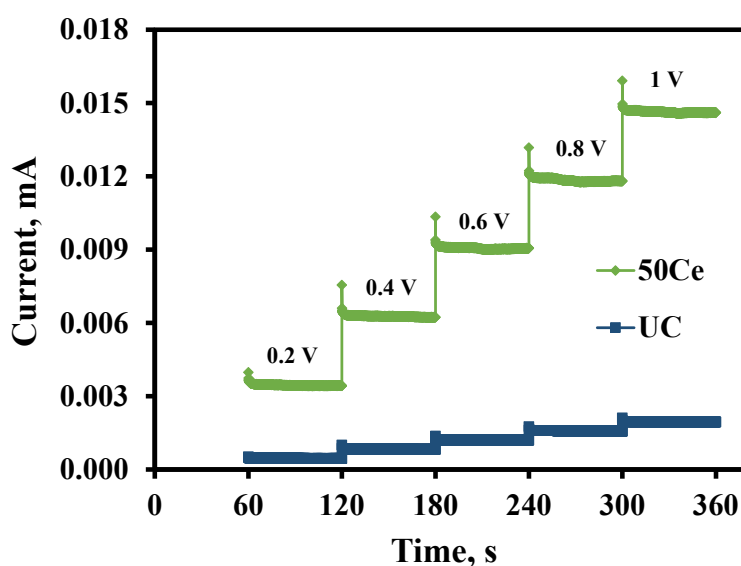

Figure S1. Chronoamperometric plot for dc conductivity measurements of uncoated (UC) and 50 cycles of CeO<sub>2</sub> ALD coated (50Ce) LiMn<sub>2</sub>O<sub>4</sub> particles at 25 °C.
